# Supplementary material for: The feasibility of laryngeal nerve protection during thyroidectomy using sternocleidomastoid intermuscular approach with intraoperative neuromonitoring: a case series and step-by-step description of surgical procedure
Source: PubMed Central journal article supplement — Gland Surg. 2022 Oct;11(10):1665–72. doi: 10.21037/gs-22-500 (PMC9638796; doi:10.21037/gs-22-500), 2022-10
Supplement: gs-11-10-1665-dss.pdf [file gs-11-10-1665-dss.pdf]

## Data Sharing Statement

Article <https://dx.doi.org/10.21037/gc-22-500>  
Info

| Item | Question                                                                                                                                            | Authors' Response<br>(place "-" if not applicable)                                                                                                 |
|------|-----------------------------------------------------------------------------------------------------------------------------------------------------|----------------------------------------------------------------------------------------------------------------------------------------------------|
| 1    | Would you like to share data collected for your study to others?                                                                                    | No.                                                                                                                                                |
| 2    | If not, would you like to share the reason for your decision?                                                                                       | -                                                                                                                                                  |
| 3    | What data in particular will be shared?                                                                                                             | -                                                                                                                                                  |
| 4    | Any other documents will be shared? Such as study protocol, statistical analysis plan, informed consent form, clinical study report, analytic code. | Statistical analysis plan, informed consent form, and clinical study report will also be shared if requested.                                      |
| 5    | When will data availability begin?                                                                                                                  | From the publication date.                                                                                                                         |
| 6    | When will data availability end?                                                                                                                    | One years within the publication date.                                                                                                             |
| 7    | To whom will you share the data?                                                                                                                    | Researchers who are interested in this study.                                                                                                      |
| 8    | For what type of analysis or purpose?                                                                                                               | For analysis to evaluate the feasibility of RLN and EBSLN functional protection during SMIA thyroidectomy with the intraoperative neuromonitoring. |
| 9    | How or where can the data/documents be obtained?                                                                                                    | Emails could be sent to the address below to obtain the shared data: fujitao@163.com.                                                              |
| 10   | Any other restrictions?                                                                                                                             | We may balance the potential benefits and risks for each request and then provide the data that could be shared.                                   |
